# Supplementary material for: Broccoli, Amaranth, and Red Beet Microgreen Juices: The Influence of Cold-Pressing on the Phytochemical Composition and the Antioxidant and Sensory Properties
Source: MDPI journal article supplement (doi:10.3390/foods13050757), 2024-02-29
Supplement: s1 [file s1]

Article

# Broccoli, Amaranth, and Red Beet Microgreen Juices: The Influence of Cold-Pressing on the Phytochemical Composition and the Antioxidant and Sensory Properties

Spasoje D. Belošević <sup>1,†</sup>, Danijel D. Milinčić <sup>2,†</sup>, Uroš M. Gašić <sup>3</sup>, Aleksandar Ž. Kostić <sup>2</sup>, Ana S. Salević-Jelić <sup>1</sup>, Jovana M. Marković <sup>1</sup>, Verica B. Đorđević <sup>4</sup>, Steva M. Lević <sup>1</sup>, Mirjana B. Pešić <sup>2,\*</sup> and Viktor A. Nedović <sup>1,\*</sup>

<sup>1</sup> Food Biotechnology Laboratory, Department of Food Technology and Biochemistry, Faculty of Agriculture, University of Belgrade, Nemanjina 6, 11080 Belgrade, Serbia; sbelosevic@agrif.bg.ac.rs (S.D.B.); ana.salevic@agrif.bg.ac.rs (A.S.S.-J.); jovana.markovic@agrif.bg.ac.rs (J.M.M.); slevic@agrif.bg.ac.rs (S.M.L.)

<sup>2</sup> Food Chemistry and Biochemistry Laboratory, Department of Food Technology and Biochemistry, Faculty of Agriculture, University of Belgrade, Nemanjina 6, 11080 Belgrade, Serbia; danijel.milincic@agrif.bg.ac.rs (D.D.M.); akostic@agrif.bg.ac.rs (A.Ž.K.)

<sup>3</sup> Department of Plant Physiology, Institute for Biological Research Siniša Stanković-National Institute of Serbia, University of Belgrade, Bulevar Despota Stefana 142, 11060 Belgrade, Serbia; uros.gasic@ibiss.bg.ac.rs

<sup>4</sup> Department of Chemical Engineering, Faculty of Technology and Metallurgy, University of Belgrade, Karnegijeva 4, 11000 Belgrade, Serbia; vmanojlovic@tmf.bg.ac.rs

\* Correspondence: mpesic@agrif.bg.ac.rs (M.B.P.); vnedovic@agrif.bg.ac.rs (V.A.N.); Tel.: +381-11-441-3315 (M.B.P.); +381-441-3154 (V.A.N.)

<sup>†</sup> These authors equally contributed to this work.

**Table S1.** Equation parameters and correlation coefficient ( $R^2$ ) of the phenolic standards used for quantification.

| Standards    | $y=a*x\pm b$                      | $R^2$  |
|--------------|-----------------------------------|--------|
| Sinapic acid | $y= 83605.5527 * x - 8503.3101$   | 0.9920 |
| Apigenin     | $y= 215501.5584 * x + 64892.2142$ | 0.9942 |
